# Supplementary material for: Expression of Glutamatergic Signaling in Canine Oral Melanocytic Neoplasms
Source: MDPI journal article supplement (doi:10.3390/vetsci12121149), 2025-12-02
Supplement: s1 [file vetsci-3917694-Supplementary Materials.pdf › vetsci-3917694-Supplementary Materials.pdf]

## Supplementary Materials

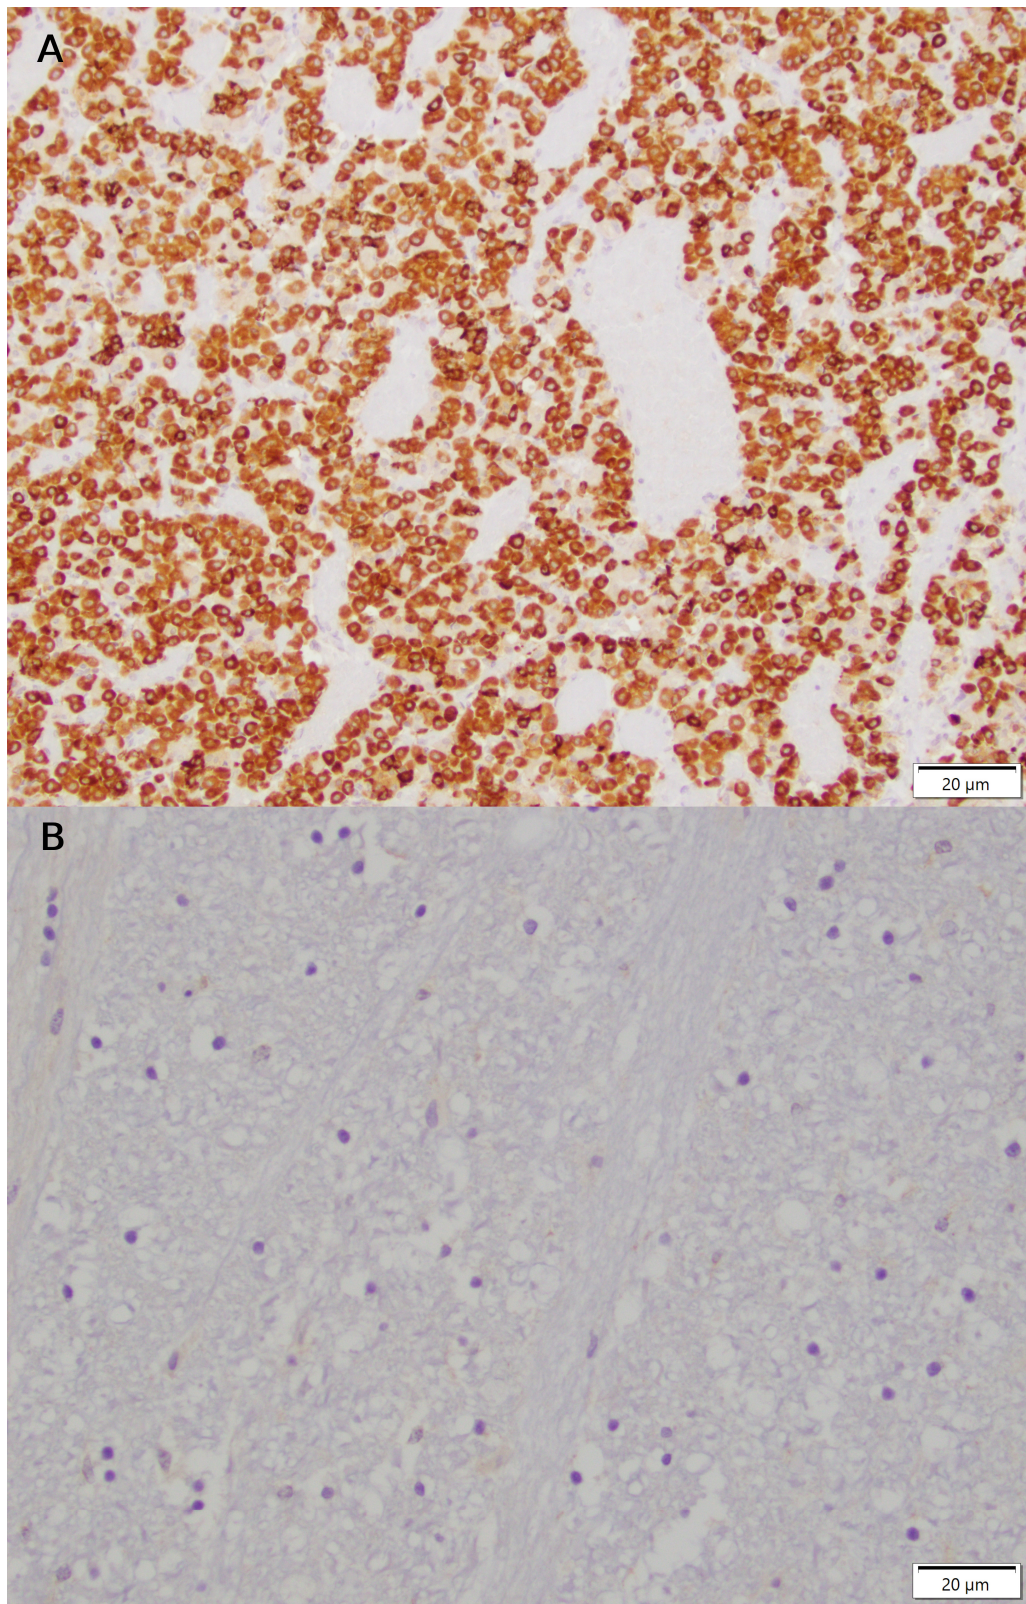

**Figure S1.** Canine brain tissue demonstrating positive mGluR1 staining in pituitary (A) and negative mGluR1 staining in brainstem (B).

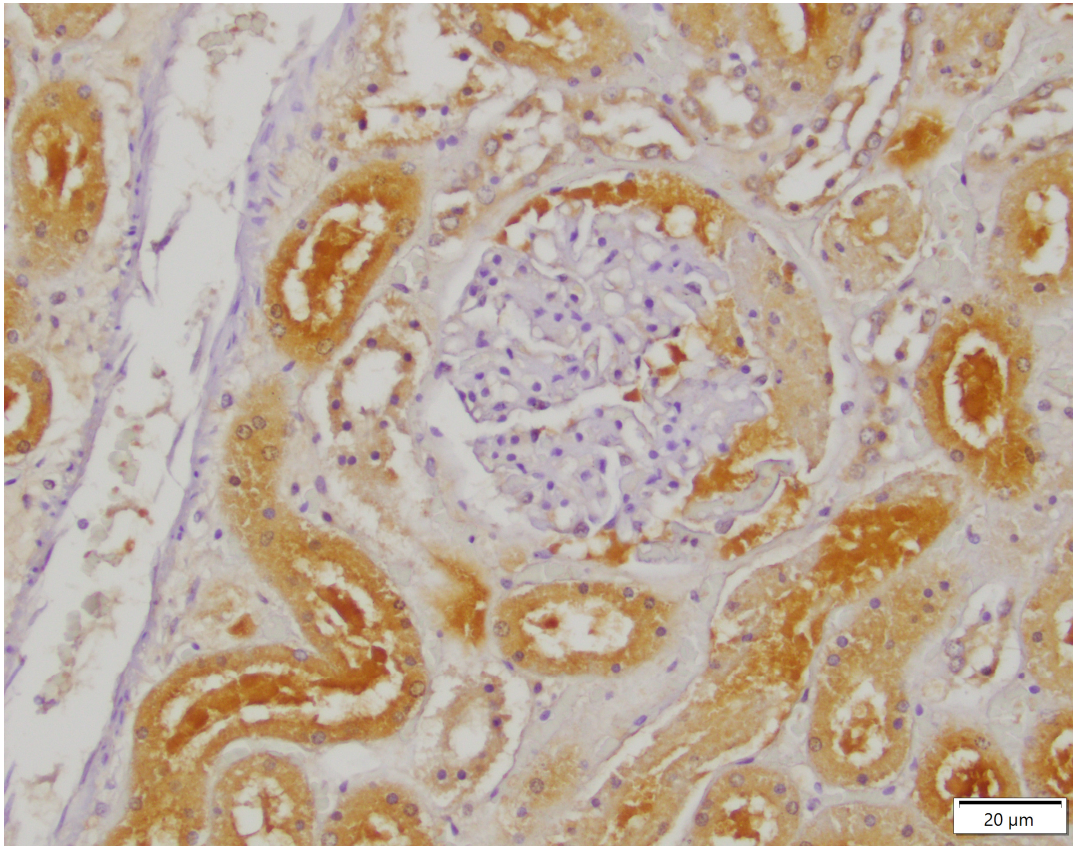

**Figure S2.** Canine renal tissue demonstrating positive GLS1 staining in tubular epithelial cells and negative GLS1 staining in glomeruli and blood vessels.
